# Supplementary material for: Measurement report: Exploring the NH 3 behaviours at urban andsuburban Beijing: Comparison and implications
Source: Copernicus journal article supplement (doi:10.5194/acp-2020-1047), 2020-11-02
Supplement: Supplementary file [file acp-2020-1047-RC2-supplement.pdf]

Comments on “Measurement report: Exploring the NH<sub>3</sub> behaviours at urban and suburban Beijing: Comparison and implications”

General comments:

This manuscript reports a yearlong parallel measurements of NH<sub>3</sub> concentration at urban of suburban sites of Beijing. Statistical analysis, seasonal variation, diel profile and the relationship with temperature, RH, H<sub>2</sub>O, wind speed and wind direct are present. This could be useful documentary for scientists who are interesting in aerosol chemistry, aerosol pH and pollutant management etc. I thus recommend publication of this manuscript on Atmospheric Chemistry and Physics.

Specific comments:

1. The author might be able to take advantage of the parallel measurements and summarize the difference in pattern of NH<sub>3</sub> pollution and source. However, there seems to be a lack of effort on the in-depth analysis.
2. The dew and NH<sub>3</sub> releasing point is interesting. I wonder if the dew point calculation could be useful to further explore and validate this point.
3. The author claimed a rain clearing effect for NH<sub>3</sub>. But in Figure 8 suburban case, there was an increasing during the rain and after the rain. Therefore, there is a inconsistency between the data and the explanation.
